# Supplementary material
Source: publisher site journal article supplement (https://www.dovepress.com/article/342624)
Supplement: Supplementary file 1 [file get_supplementary_file.php]

**Supplementary File 1 The ESUO Questionnaire**

**Please answer the following questions:**

- **Do you have a state health care coverage?**
- **Do you have a private health care coverage?** YES or NO
- **How old are you?** 18-29 yrs

30**-**39 yrs

40-59 yrs

- 1. yrs

70 and over

1. **What do you think is the most critical aspect that makes a high-quality urologist? (**Please select 1 for the most important factor up to 5 for the less important)

| 1 | Listens and pays attention to the patient |  |
| --- | --- | --- |
| 2 | Cares about patients, the patient is his/her priority |  |
| 3 | There are good communication and relationship with patients |  |
| 4 | Polite, good manners, positive personality traits |  |
| 5 | I do not care about positive personality traits of my urologist |  |

1. **What do you think is the most critical aspect that makes a high-quality urologist? (**Please select 1 for the most important factor up to 5 for the less important)

| 1 | Makes precise diagnosis and accurate treatment |  |
| --- | --- | --- |
| 2 | Pays attention to details and spends time examining patients |  |
| 3 | Experienced urologist |  |
| 4 | Excellent training, participation in post-graduate courses |  |
| 5 | I do not care about the efficiency and training of my urologist |  |

1. **What do you think is the most critical aspect that makes a high-quality urologist? (**Please select 1 for the most important factor up to 5 for the less important)

| 1 | There is an excellent office environment, and the staff is polite |  |
| --- | --- | --- |
| 2 | There is not a long waiting list |  |
| 3 | Punctual on waiting time in office for an examination |  |
| 4 | Accept my insurance, he/she is affordable |  |
| 5 | I do not mind if my urologist is accessible and affordable |  |

1. **What do you think is the most critical aspect that makes a high-quality urologist? (**Please select 1 for the most important factor up to 4 for the less important)

| 1 | Positive personality traits |  |
| --- | --- | --- |
| 2 | Efficient and well trained |  |
| 3 | Accessible and affordable |  |
| 4 | Excellent office environment and polite staff |  |

1. **What do you think is the most essential factor that makes a poor-quality urologist? (**Please select 1 for the most important factor up to 5 for the less important)

| 1 | Doesn’t listen to patients |  |
| --- | --- | --- |
| 2 | Doesn’t care for the patient, lack of medical philosophy |  |
| 3 | Focuses too much on financial topics |  |
| 4 | The poor manner and lousy behavior |  |
| 5 | I do not care about negative personality traits of my urologist |  |

1. **What do you think is the most essential factor that makes a poor-quality urologist? (**Please select 1 for the most important factor up to 5 for the less important)

| 1 | Makes improper diagnoses, incorrect treatment |  |
| --- | --- | --- |
| 2 | Lack of interest for medical details, not systematic examination |  |
| 3 | Inexperienced, inadequate training, lack of continuous training |  |
| 4 | Spends less time with patients, too many patients to examine |  |
| 5 | I do not care about the efficiency and training of my urologist |  |

1. **What do you think is the most essential factor that makes a poor-quality urologist? (**Please select 1 for the most important factor up to 5 for the less important)

| 1 | Bad office environment and impolite office staff, difficult parking |  |
| --- | --- | --- |
| 2 | Very difficult to get an appointment, too busy |  |
| 3 | Unpunctual, long waiting time in office for an examination |  |
| 4 | Costs are too high / don’t accept my insurance |  |
| 5 | I do not mind if my urologist is accessible and affordable |  |

1. **What do you think is the most essential factor that makes a poor-quality urologist? (**Please select 1 for the most important factor up to 4 for the less important)

| 1 | Negative personality traits of my urologist |  |
| --- | --- | --- |
| 2 | Poor efficiency and training of my urologist |  |
| 3 | Is not accessible and financially affordable |  |
| 4 | Bad office environment and impolite office staff |  |

1. **Do you evaluate the information you get from any of the following sources concerning the quality of your urologists? (**Please select 1 for the most important and 6 for the less important)

| Friends or family |  |
| --- | --- |
| Local newspaper or magazine |  |
| Others Doctor |  |
| Health insurance company |  |
| Professional websites |  |
| Online on a community group’s website |  |

1. **How confident are you when another doctor recommends you a urologist for you?** (Please check only one answer)

| Very confident |  |
| --- | --- |
| Moderately confident |  |
| Not too / not at all confident |  |
| Don’t know |  |

1. **How confident are you when a friend or a family member recommends you a urologist for you?** (Please check only one answer)

| Very confident |  |
| --- | --- |
| Moderately confident |  |
| Not too / not at all confident |  |
| Don’t know |  |

1. **How confident are you when a community group’s website recommends you a urologist for you?** (Please check only one answer)

| Very confident |  |
| --- | --- |
| Moderately confident |  |
| Not too / not at all confident |  |
| Don’t know |  |

1. **Tick the right answer (for European countries with a private and state health-care sector)** (Please check only one answer)

| Higher-quality health care usually comes at a higher cost |  |
| --- | --- |
| Lower-quality health care usually come at a lower cost |  |
| There is no relationship between the quality and cost of health care |  |
| Dont’ know |  |

1. **In general, how would you rate the urology health care you receive?** Please answer good, poor, or neither nor poor
